# Supplementary material for: DisoLipPred: accurate prediction of disordered lipid-binding residues in protein sequences with deep recurrent networks and transfer learning
Source: Oxford University Press journal article supplement (doi:10.1093/bioinformatics/btab640), 2021-09-06
Supplement: btab640_supplementary_data.pdf [file btab640_supplementary_data.pdf]

# Supplement for “DisoLipPred: Accurate prediction of disordered lipid binding residues in protein sequences with deep recurrent networks and transfer learning”

Akila Katuwawala<sup>1</sup>, Bi Zhao<sup>1</sup>, Lukasz Kurgan<sup>1\*</sup>

<sup>1</sup>Department of Computer Science, Virginia Commonwealth University, Richmond, VA 23284, USA

## Supplementary Tables

**Supplementary Table S1.** Description of the training and test datasets.

| Dataset       | Number of residues       |            |           | Number of proteins |       |
|---------------|--------------------------|------------|-----------|--------------------|-------|
|               | disordered lipid binding | disordered | all       | fully structured   | all   |
| ALL dataset   | 1,921                    | 141,018    | 2,426,416 | 1,446              | 2,892 |
| LIPID dataset | 1,921                    | 17,823     | 96,015    | 100                | 211   |
| Test dataset  | 1,471                    | 20,623     | 106,348   | 100                | 219   |

**Supplementary Table S2.** Partner-agnostic sequence profile.

| Description                                     | Source                           |
|-------------------------------------------------|----------------------------------|
| Predicted disorder propensity                   | Predicted with SPOT-Disorder [1] |
| Predicted solvent accessibility                 | Predicted with ASAquick [2]      |
| Predicted coil propensity                       | Predicted with PSIPRED [3]       |
| Predicted helix propensity                      | Predicted with PSIPRED [3]       |
| Predicted strand propensity                     | Predicted with PSIPRED [3]       |
| Predicted disordered protein binding propensity | Predicted with DisoRDPbind [4]   |
| Predicted disordered DNA binding propensity     | Predicted with DisoRDPbind [4]   |
| Predicted disordered RNA binding propensity     | Predicted with DisoRDPbind [4]   |
| Predicted flexible linker propensity            | Predicted with DFLpred [5]       |
| Predicted disordered protein binding propensity | Predicted with ANCHOR [6]        |

**Supplementary Table S3.** Extended profile for the prediction of DLBRs.

| Description                                                        | Source                                 |
|--------------------------------------------------------------------|----------------------------------------|
| Predicted disorder propensity                                      | Predicted with SPOT-Disorder [1]       |
| Predicted solvent accessibility                                    | Predicted with ASAquick [2]            |
| Predicted coil propensity                                          | Predicted with PSIPRED [3]             |
| Predicted helix propensity                                         | Predicted with PSIPRED [3]             |
| Predicted strand propensity                                        | Predicted with PSIPRED [3]             |
| Hydropathy                                                         | Extracted from AAindex [9]: KYTJ820101 |
| Net charge                                                         | Extracted from AAindex [9]: KLEP840101 |
| Polarity                                                           | Extracted from AAindex [9]: GRAR740102 |
| Unfolding Gibbs energy values in water                             | Extracted from AAindex [9]: YUTK870101 |
| Transfer energy                                                    | Extracted from AAindex [9]: OOBM850103 |
| Solvation free energy                                              | Extracted from AAindex [9]: EISD860101 |
| Absolute entropy                                                   | Extracted from AAindex [9]: HUTJ700102 |
| Isoelectric point                                                  | Extracted from AAindex [9]: ZIMJ680104 |
| Charge transfer                                                    | Extracted from AAindex [9]: CHAM830107 |
| Charge donor                                                       | Extracted from AAindex [9]: CHAM830108 |
| Positive charge                                                    | Extracted from AAindex [9]: FAUJ880111 |
| Negative charge                                                    | Extracted from AAindex [9]: FAUJ880112 |
| Argos hydrophobicity                                               | Extracted from AAindex [9]: ARG820101  |
| Kyte-Doolittle hydrophobicity                                      | Extracted from AAindex [9]: JURD980101 |
| Manavalan-Ponnuswamy hydrophobicity                                | Extracted from AAindex [9]: MANP780101 |
| Cowan-Whittaker hydrophobicity                                     | Extracted from AAindex [9]: COWR900101 |
| Casari-Sippl hydrophobicity                                        | Extracted from AAindex [9]: CASG920101 |
| Alpha-CH chemical shifts                                           | Extracted from AAindex [9]: ANDN920101 |
| Spin-spin coupling constants                                       | Extracted from AAindex [9]: GRAR740103 |
| Membrane preference                                                | Extracted from AAindex [9]: DESM900101 |
| Atom-based hydrophobic moment                                      | Extracted from AAindex [9]: EISD860102 |
| Direction of the hydrophobic moment                                | Extracted from AAindex [9]: EISD860103 |
| B-values                                                           | Extracted from AAindex [9]: PARS000101 |
| Distribution frequencies in thermophilic proteins                  | Extracted from AAindex [9]: KUMS000101 |
| B-values for residues with a rigid neighbor                        | Extracted from AAindex [9]: VINM940103 |
| 14 A contact number                                                | Extracted from AAindex [9]: NISK860101 |
| Free energies of transfer peptides from bilayer interface to water | Extracted from AAindex [9]: WIMW960101 |
| Optimized side chain interaction parameter                         | Extracted from AAindex [9]: OOBM850105 |
| Fraction of site occupied by water                                 | Extracted from AAindex [9]: KRIW790102 |
| Partition coefficient for ionic strength                           | Extracted from AAindex [9]: ZASB820101 |
| Side chain hydropathy corrected for solvation                      | Extracted from AAindex [9]: ROSM880102 |
| Affinity to bind transmembrane regions                             | Extracted from AAindex [9]: NAKH900112 |
| Solvation free energy                                              | Extracted from AAindex [9]: EISD860101 |
| Activation Gibbs energy of unfolding at pH 9.0                     | Extracted from AAindex [9]: YUTK870104 |
| Relative preference value at N2                                    | Extracted from AAindex [9]: RICJ880105 |
| STERIMOL length of the side chain                                  | Extracted from AAindex [9]: FAUJ880104 |
| Transfer free energy from chx to oct                               | Extracted from AAindex [9]: RADA880104 |
| Propensity for N-terminal turn                                     | Extracted from AAindex [9]: ROBB760109 |
| Side chain torsion angle                                           | Extracted from AAindex [9]: LEVM760104 |
| Ratio of average and computed composition                          | Extracted from AAindex [9]: NAKH900113 |
| Helix initiation parameter                                         | Extracted from AAindex [9]: FINA910101 |
| Pleated-sheet propensity                                           | Extracted from AAindex [9]: ROBB760106 |
| AA composition of mt-proteins from fungi and plant                 | Extracted from AAindex [9]: NAKH900107 |
| Alpha-helix propensity                                             | Extracted from AAindex [9]: KOEP990101 |
| Alpha-helix propensity for alpha/beta-proteins                     | Extracted from AAindex [9]: GEIM800104 |
| Normalized alpha-helix frequency                                   | Extracted from AAindex [9]: MAXF760101 |

**Supplementary Table S4.** Predictive performance of DisoLipPred and its variants from the ablation analysis (Table 1) on the validation dataset. We perform the assessment on the complete validation dataset, and also on the subset of disordered residues from the validation dataset. We quantify the binary metrics (sensitivity and F1) at the fixed specificity = 0.9. This enables direct comparison of the binary metrics between different variants.

| Setup       | Complete validation dataset |             |             |       | Disordered residues in the validation dataset |             |             |       |
|-------------|-----------------------------|-------------|-------------|-------|-----------------------------------------------|-------------|-------------|-------|
|             | AUC                         | Sensitivity | Specificity | F1    | AUC                                           | Sensitivity | Specificity | F1    |
| DisoLipPred | 0.809                       | 0.228       | 0.900       | 0.149 | 0.708                                         | 0.351       | 0.900       | 0.190 |
| 1           | 0.769                       | 0.221       | 0.900       | 0.081 | 0.701                                         | 0.313       | 0.900       | 0.172 |
| 2           | 0.710                       | 0.080       | 0.900       | 0.072 | 0.660                                         | 0.128       | 0.900       | 0.074 |
| 3           | 0.669                       | 0.206       | 0.900       | 0.077 | 0.564                                         | 0.241       | 0.900       | 0.134 |
| 4           | 0.600                       | 0.120       | 0.900       | 0.039 | 0.500                                         | 0.088       | 0.900       | 0.052 |

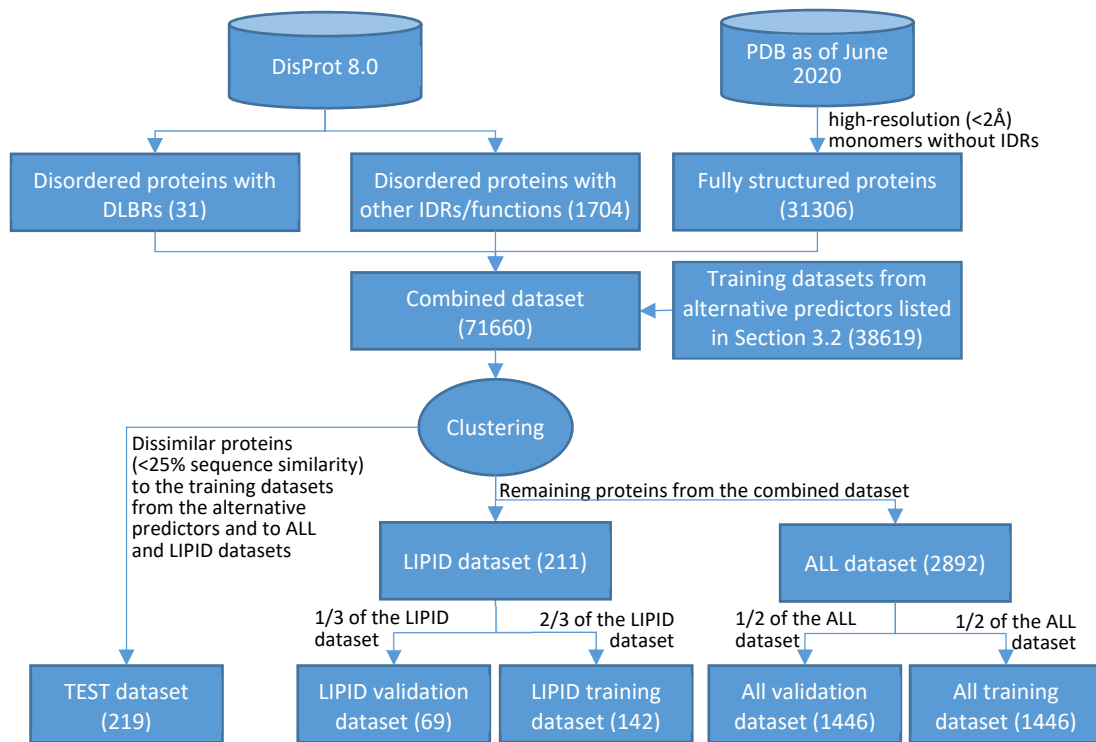

**Supplementary Figure S1:** Flowchart for the generation of training, validation and test datasets. The numbers in the round brackets give the numbers of proteins in a given protein set.

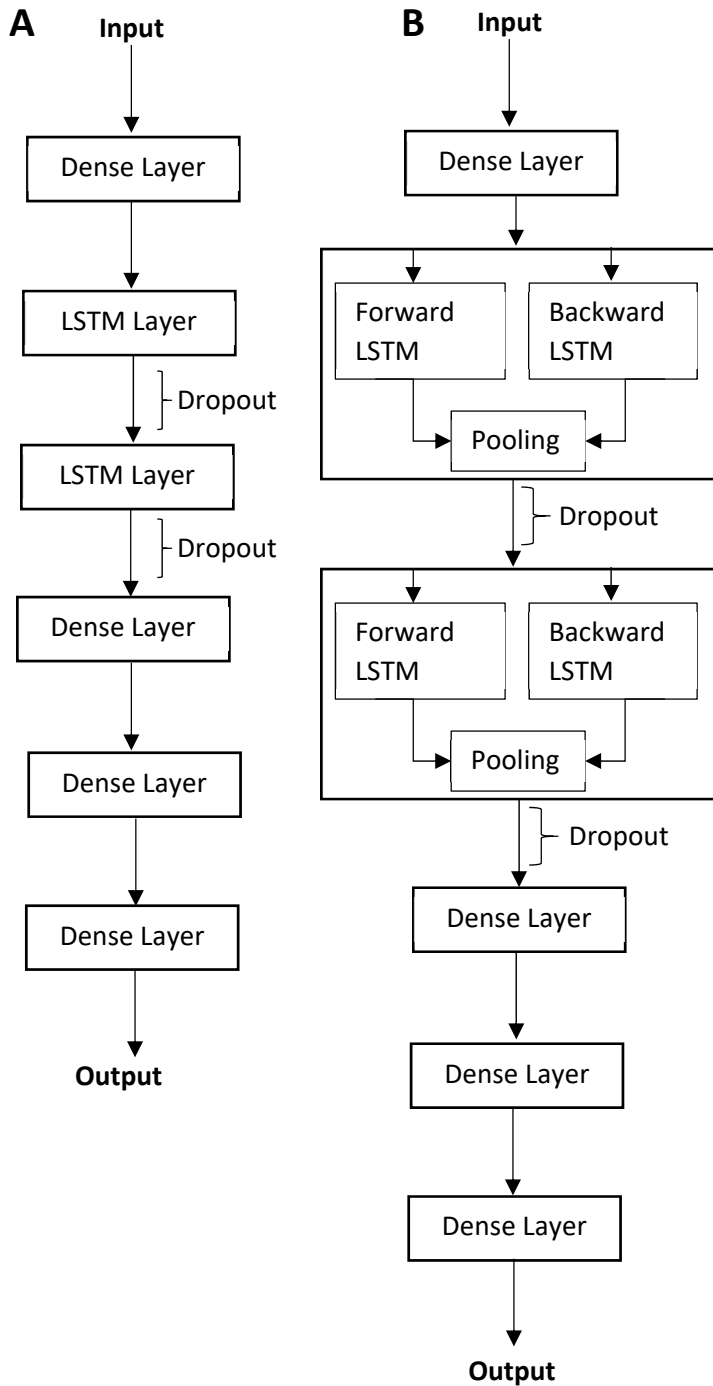

**Supplementary Figure S2.** Architecture of the deep recurrent neural network used by DisoLipPred. Panel A shows the partner-agnostic network that we train using the dataset of IDRs that interact with different partner types. Panel B gives the network that extends the partner-agnostic network to perform the partner-specific prediction of DLBRs.

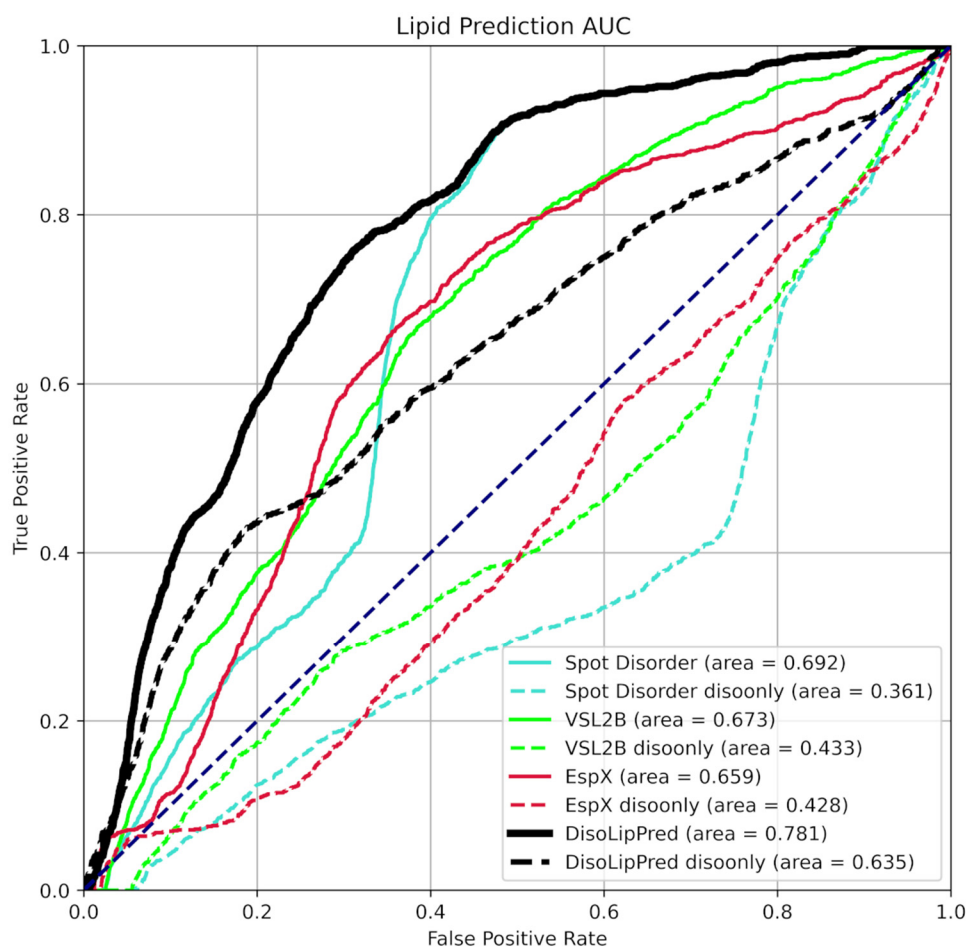

**Supplementary Figure S3.** ROC curves and AUC values on the test dataset for the prediction of DLBRs. Solid lines represent results on the complete test dataset while dashed lines show results on the native disordered residues in the test dataset.

## References

- Hanson, J., et al., *Improving protein disorder prediction by deep bidirectional long short-term memory recurrent neural networks*. Bioinformatics, 2017. **33**(5): p. 685-692.
- Faraggi, E., Y.Q. Zhou, and A. Kloczkowski, *Accurate single-sequence prediction of solvent accessible surface area using local and global features*. Proteins, 2014. **82**(11): p. 3170-3176.
- Buchan, D.W.A., et al., *Scalable web services for the PSIPRED Protein Analysis Workbench*. Nucleic Acids Research, 2013. **41**(W1): p. W349-W357.
- Peng, Z., et al., *Prediction of Disordered RNA, DNA, and Protein Binding Regions Using DisoRDPbind*, in *Prediction of Protein Secondary Structure*, Y. Zhou, et al., Editors. 2017, Springer New York: New York, NY. p. 187-203.
- Meng, F. and L. Kurgan, *DfLpred: High-throughput prediction of disordered flexible linker regions in protein sequences*. Bioinformatics, 2016. **32**(12): p. i341-i350.
- Meszaros, B., G. Erdos, and Z. Dosztanyi, *IUPred2A: context-dependent prediction of protein disorder as a function of redox state and protein binding*. Nucleic Acids Res, 2018. **46**(W1): p. W329-W337.
- Hanson, J., K. Paliwal, and Y. Zhou, *Accurate Single-Sequence Prediction of Protein Intrinsic Disorder by an Ensemble of Deep Recurrent and Convolutional Architectures*. Journal of Chemical Information and Modeling, 2018. **58**(11): p. 2369-2376.
- Faraggi, E., Y. Zhou, and A. Kloczkowski, *Accurate single-sequence prediction of solvent accessible surface area using local and global features*. Proteins, 2014. **82**(11): p. 3170-3176.
- Kawashima, S., et al., *AAindex: amino acid index database, progress report 2008*. Nucleic acids research, 2008. **36**(Database issue): p. D202-D205.
